# Supplementary material for: Quantitative Approach to Fragmented QRS in Arrhythmogenic Cardiomyopathy: From Disease towards Asymptomatic Carriers of Pathogenic Variants
Source: MDPI journal article supplement (doi:10.3390/jcm9020545), 2020-02-17
Supplement: s1 [file s1]

Supplementary material

Supplementary Table 1. Correction using multivariate linear regression for age difference between groups.

|                             | Unstandardized B | Coefficients Std. Error | Standardized Coefficients Beta | t     | P value |
|-----------------------------|------------------|-------------------------|--------------------------------|-------|---------|
| Age                         | 0.007            | 0.60                    | 0.007                          | 0.123 | 0.903   |
| ACM without prior SVA       | 17.588           | 2.507                   | 0.519                          | 7.014 | <0.001  |
| ACM with prior SVA          | 22.377           | 2.717                   | 0.574                          | 8.235 | <0.001  |
| Pathogenic variant carriers | 20.064           | 2.830                   | 0.451                          | 7.091 | <0.001  |

**Legend Table 1:** ACM = arrhythmogenic cardiomyopathy; Q-fQRS = mean quantitative fragmented QRS count.

Supplementary Figure 1. Correlation between Terminal Activation Duration and Q-fQRS.

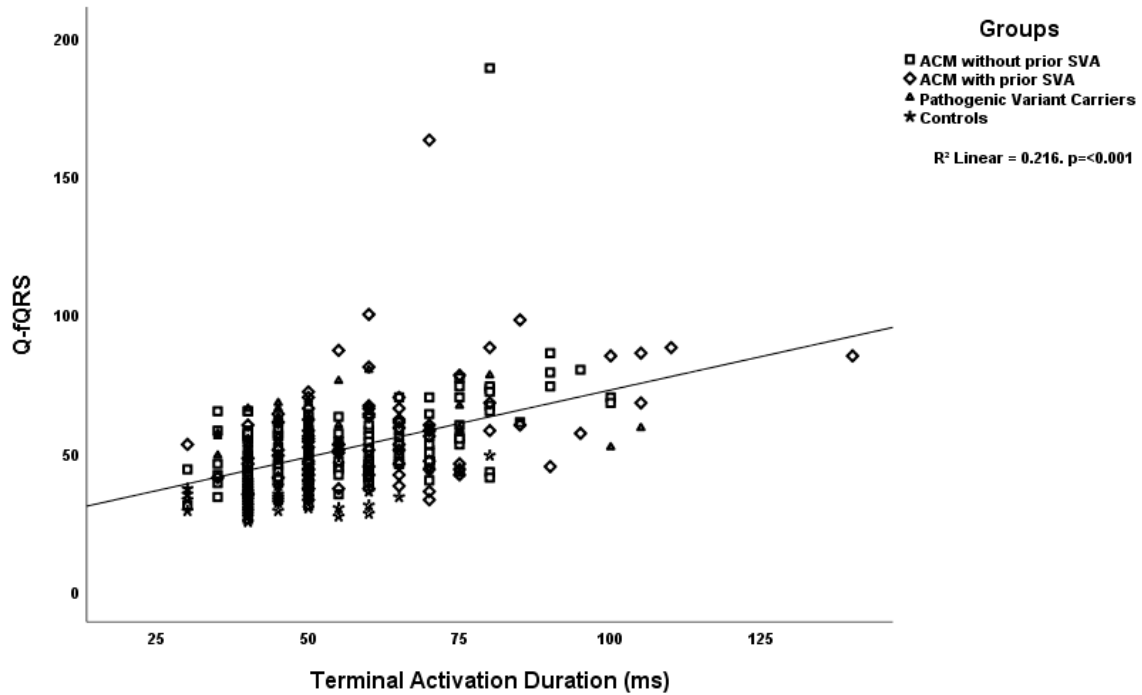

Legend supplementary Figure 1: Q-fQRS = mean quantitative fragmented QRS count.

Supplementary figure 2. Q-fQRS count according to Phenotype.

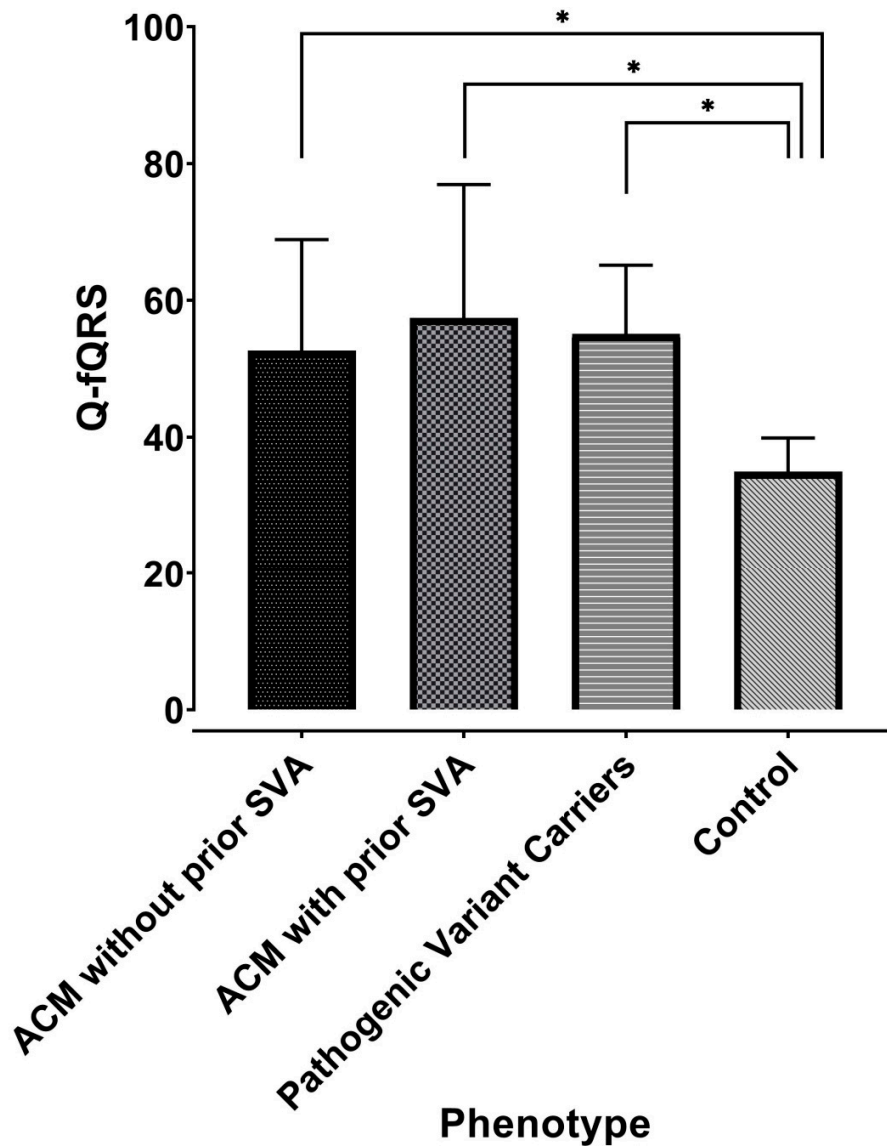

Legend supplementary figure 2: ACM = arrhythmogenic cardiomyopathy; Q-fQRS = mean quantitative fragmented QRS count. Differences in Q-fQRS: ACM patients without prior SVA vs. ACM patients with previous SVA  $p=0.081$ , ACM patients with prior SVA vs. pathogenic variant carriers  $p=0.883$ , pathogenic variant carriers vs. controls  $p=0.0001$ , ACM patients

without prior SVA vs. pathogenic variant carriers  $p=0.64$ , ACM patients with prior SVA vs. controls  $p=0.0001$ , ACM patients without prior SVA vs. controls  $p=0.0001$ .

Supplementary Figure 3. Receiver operating characteristics (ROC) curve Q-fQRS.

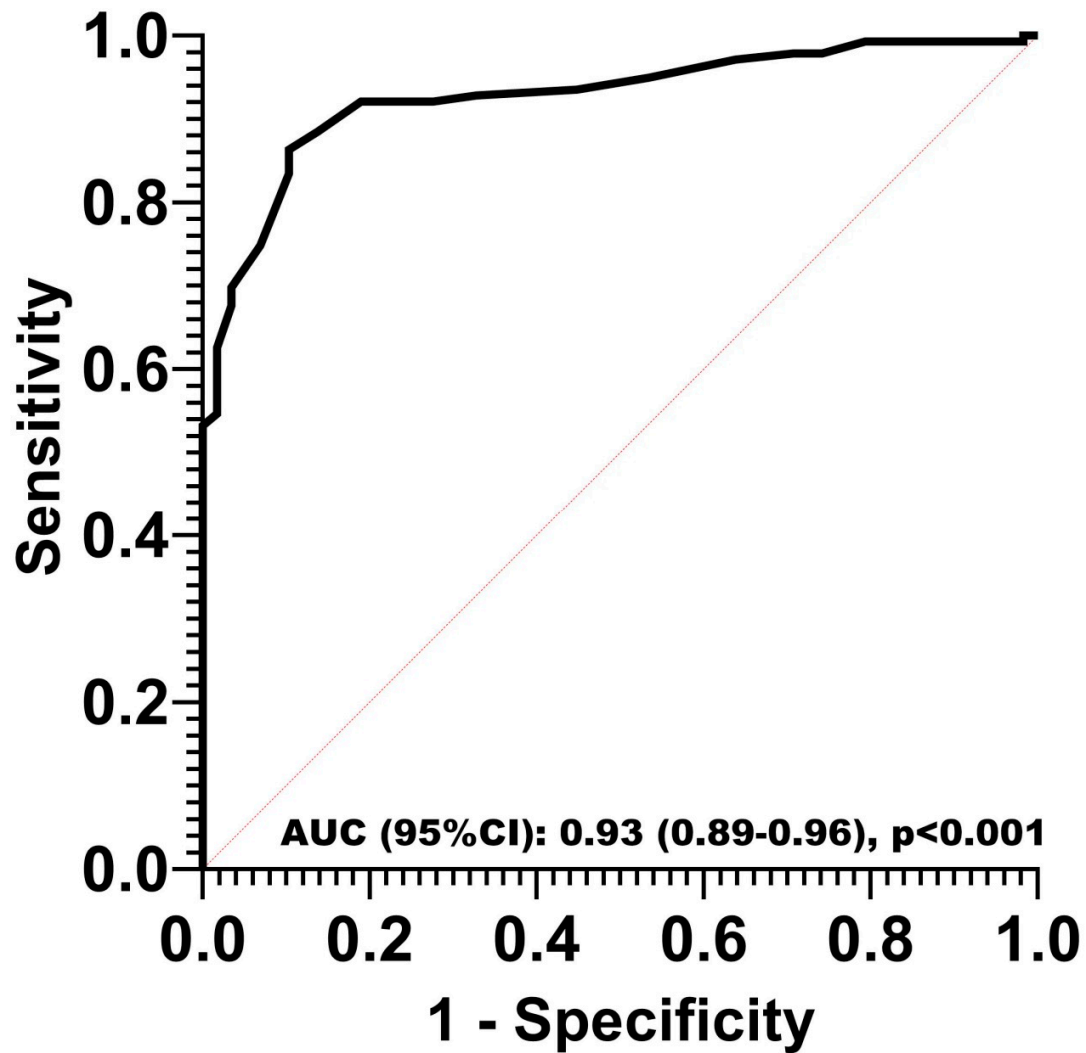

Legend supplementary Figure 3: receiver operator characteristics (ROC) curve for Q-fQRS as predictor of definite ACM diagnosis.

Supplementary Figure 4. Differences between Q-fQRS per Phenotype and ECG leads.

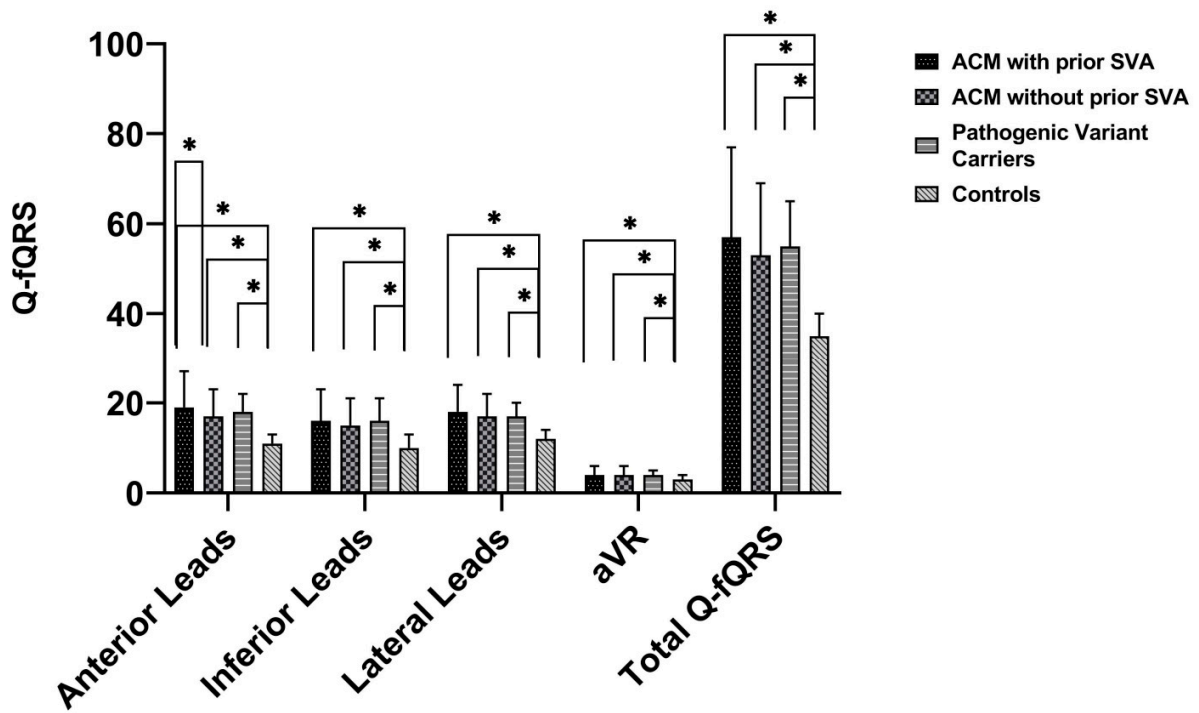

Legend supplementary Figure 4: ACM = arrhythmogenic cardiomyopathy; SVA = sustained ventricular arrhythmia; Q-fQRS = mean quantitative fragmented QRS count. \* significant difference between groups.

Supplementary Figure 5. Boxplots of Q-fQRS after age and sex matching between pathogenic variant carriers and control subjects.

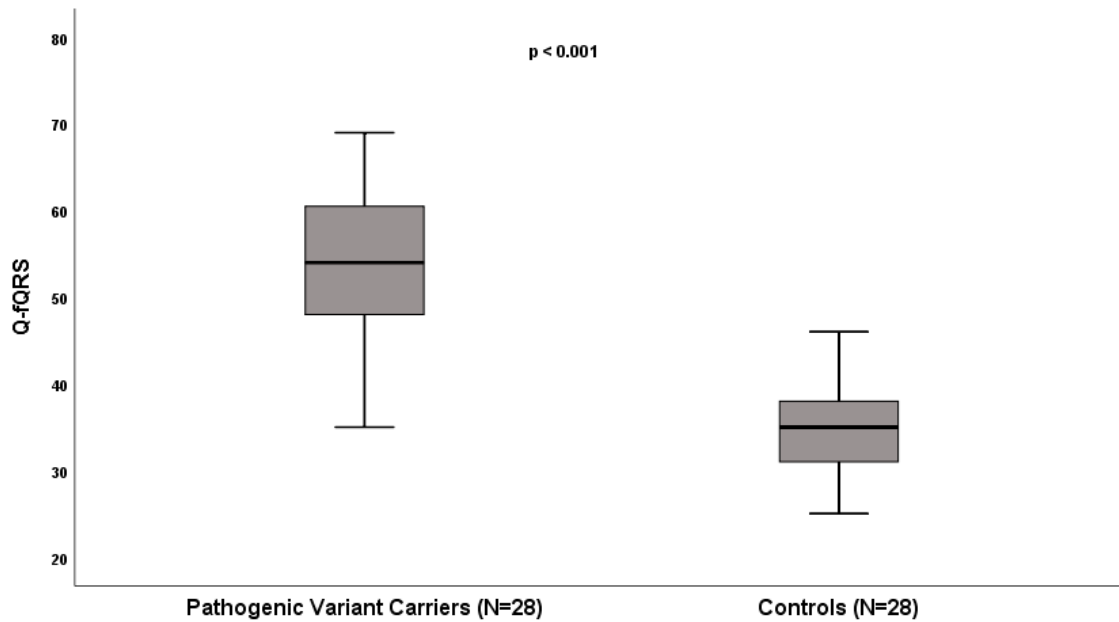

Legend supplementary Figure 5: Q-fQRS = mean quantitative fragmented QRS count.

Supplementary Figure 6. Correlation age and Q-fQRS according to phenotype.

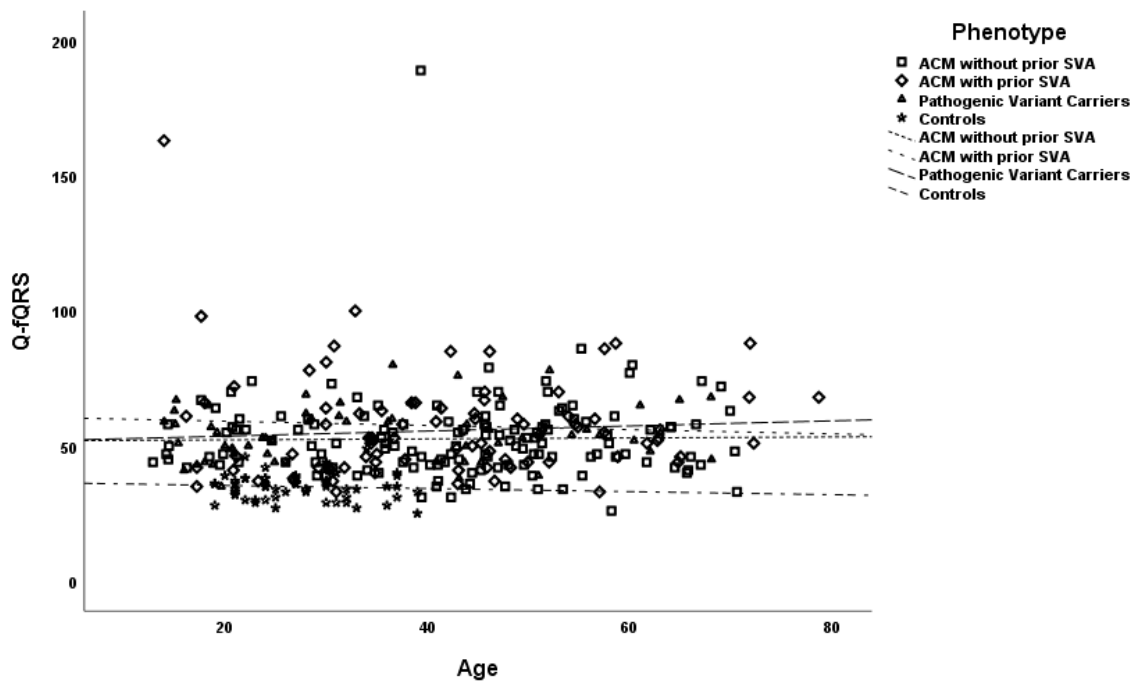

**Legend supplementary Figure 6:** Q-fQRS = mean quantitative fragmented QRS count; ACM without prior SVA =  $R^2$  Linear:  $< 0.001$ ,  $p = 0.851$ ; ACM with prior SVA:  $R^2$  Linear =  $0.004$ ,  $p = 0.599$ ; Pathogenic Variant Carriers:  $R^2$  Linear =  $0.024$ ,  $p = 0.254$ ; Controls:  $R^2$  Linear =  $0.004$ ,  $p = 0.628$ .
